# Supplementary material
Source: publisher figshare collection journal article supplement (https://springernature.figshare.com/ndownloader/files/14136668)
Supplement: Supplementary file 1 [file 14136668]

## Sheet: README
Additional File 4
Contains list of final included literature with unique article IDs

## Sheet: Final Included Lit
Article ID	Authors	Year	Title
1	Abtew AA, Pretzsch J, Secco L, Mohamod TE	2014	Contribution of Small-Scale Gum and Resin Commercialization to Local Livelihood and Rural Economic Development in the Drylands of Eastern Africa
2	Adhikari B	2005	Poverty, property rights and collective action: understanding the distributive aspects of common property resource management
3	Adhikari B, Di Falco S, Lovett J	2004	Household characteristics and forest dependency: evidence from common property forest management in Nepal
4	Adhikari B, Lovett J	2006	Transaction costs and community-based natural resource management in Nepal
5	Adhikari J ; Ojha H ; Bhattarai	2016	Edible forest? Rethinking Nepal's forest governance in the era of food insecurity
6	Adhikari S ; Kingi T ; Ganesh S ;	2016	Incentives and Community Participation in the Governance of Community Forests in Nepal
9	Agarwal B	2010	Does Women's Proportional Strength Affect their Participation? Governing Local Forests in South Asia
7	Agrawal A ; Chhatre A ; Gerber ER	2015	Motivational Crowding in Sustainable Development Interventions
8	Agrawal A, Gupta K	2005	Decentralization and Participation: The Governance of Common Pool Resources in Nepal√¢‚Ç¨‚Ñ¢s Terai
10	Agustsson K ; Garibjana A ; Rojas E ; Vatn A	2014	An assessment of the Forest Allowance Programme in the Juma Sustainable Development Reserve in Brazil
11	Ahenkan A, Boon E	2011	Improving Nutrition and Health through Non-timber Forest Products in Ghana
12	Akhter S ; Sohel Md S. I; Rana Md P; Alamgir M ;	2009	Impact of forest and non-forest villagers on Ukhia and Inani forest range under Cox's bazar (south) forest division, Bangladesh
13	Ali, T.; Ahmad, M.; Shahbaz, B.; Suleri, A.	2007	Impact of participatory forest management on vulnerability and livelihood assets of forest-dependent communities in northern Pakistan
220	Ali, T.; Ahmad, M.; Shahbaz, B.; Suleri, A.	2007	Impact of participatory forest management on financial assets of rural communities in Northwest Pakistan
14	Alix-Garcia J, Aronson G, Radeloff V, Ramirez-Reyes C, Shapiro E, Sims K, Ya√É¬±ez-Pagans P	2014	Environmental and Socioeconomic Impacts of Mexico's Payments for Ecosystem Services Program
15	Almeyda, A.M.; Broadbent, E.N.; Wyman, M.S.; Durham, W.H.	2010	Ecotourism impacts in the Nicoya Peninsula, Costa Rica
16	Ambrose-Oji B ; Lawrence A ; Stewart A ;	2015	Community based forest enterprises in Britain: Two organising typologies
18	Ameha A ; Nielsen O J; Larsen H O;	2014	Impacts of access and benefit sharing on livelihoods and forest: Case of participatory forest management in Ethiopia
19	Amin V, Yok M	2015	Thematic Interpretation Approach in Environmental Adult Education
20	Andam KS, Ferraro PJ, Sims KRE, Healy A, Holland MB	2010	Protected areas reduced poverty in Costa Rica and Thailand
21	Arriagada R, Sills E, Ferraro P, Pattanayak S	2015	Do Payments Pay Off? Evidence from Participation in Costa Rica's PES Program
22	Arriagada R, Sills E, Pattanayak S, Ferraro P	2009	Combining Qualitative and Quantitative Methods to Evaluate Participation in Costa Rica's Program of Payments for Environmental Services
23	Atela J, Minang P, Quinn C, Duguma L	2015	Implementing REDD+ at the local level: Assessing the key enablers for credible mitigation and sustainable livelihood outcomes
24	Bacon CM, Mendex VE, Gomez MEF, Stuart D, Flores SRD	2008	Are Sustainable Coffee Certifications Enough to Secure Farmer Livelihoods? The Millenium Development Goals and Nicaragua's Fair Trade Cooperatives
25	Bahuguna V	2000	Forests in the Economy of the Rural Poor: An Estimation of the Dependency Level
26	Bandyopadhyay S, Humavindu M, Shyamsundar P, Wang L	2009	Benefits to local communities from community conservancies in Namibia: an assessment
27	Baral, N.; Stern, M. J.	2011	A comparative study of two community-based conservation models in Nepal
28	Barbier E	2006	Mangrove Dependency and the Livelihoods of Coastal Communities in Thailand
29	Barbier E	2008	In the wake of tsunami: Lessons learned from the household decision to replant mangroves in Thailand
30	Barli O, Baskent E, Turker M, Gedik T	2006	Analytical approach for analyzing and providing solutions for the conflicts among forest stakeholders across Turkey
183	Bauch SC, Sills EO, Pattanayak SK	2014	Have We Managed to Integrate Conservation and Development? ICDP Impacts in the Brazilian Amazon
31	Beauchamp, E. and Ingram, V.	2011	Impacts of Community Forests on Livelihoods in Cameroon: Lessons from Two Case Studies.
32	Beitl CM	2011	Cockles in custody: The role of common property arrangements in the ecological sustainability of mangrove fisheries on the Ecuadorian coast
184	Bellin F	1994	Smallholder Tree Crops in Sierra Leone: Impacts on Food Consumption and Nutrition
33	Biggs D, Turpieb J, Fabriciusc C, Spenceleyd A	2011	The Value of Avitourism for Conservation and Job Creation: An Analysis from South Africa
34	Bista S, Webb EL	2006	Collection and marketing of non-timber forest products in the far western hills of Nepal
228	Bowler DE, Buyung-Ali LM, Healey JR, Jones JPG, Knight TM, Pullin AS	2012	Does community forest management provide global environmental benefits and improve local welfare?
185	Broadbent EN, Zambrano AMA, Dirzo R, Durham WH, Driscoll L, Gallagher P, Salters R, Schultz J, Colmenares A, Randolph SG	2012	The effect of land use change and ecotourism on biodiversity: a case study of Manuel Antonio, Costa Rica, from 1985 to 2008
229	Brooks J, Waylen KA, Mulder MB	2013	Assessing community-based conservation projects: A systematic review and multilevel analysis of attitudinal, behavioral, ecological, and economic outcomes
35	Buchenrieder G, Balgah RA	2013	Sustaining livelihoods around community forests. What is the potential contribution of wildlife domestication?*
36	Buffum B, Lawrence A, Temphel KJ	2010	Equity in Community Forests in Bhutan
37	Bukenya M, Johnsen FH, Gombya-Ssembajjwe WS	2009	ENVIRONMENTAL AND EXCHANGE ENTITLEMENTS FROM EUCALYPTUS WOODLOTS: THE CASE OF MUKONO DISTRICT IN UGANDA
186	Bullock A, King B	2011	Evaluating China's Slope Land Conversion Program as sustainable management in Tianquan and Wuqi Counties
38	Campos P, Daly-Hassen H, Oviedo JL, Ovando P, Chebil A	2008	Accounting for single and aggregated forest incomes: Application to public cork oak forests in Jerez (Spain) and Iteimia (Tunisia)
39	Cao S, Wang X, Song Y, Chen L, Feng Q	2010	Impacts of the Natural Forest Conservation Program on the livelihoods of residents of Northwestern China: Perceptions of residents affected by the program
40	Cao S, Zhong B, Yue H, Zeng H, Zeng J	2009	Development and testing of a sustainable environmental restoration policy on eradicating the poverty trap in China's Changting County
41	Chand N, Kerr GN, Bigsby H	2015	Production efficiency of community forest management in Nepal
162	Charnley S, Donoghue E, Moseley C	2008	Forest Management Policy and Community Well-Being in the Pacific Northwest
42	Chen H, Ting Z, Krott M, Calvo JF, Ganesh SP, Makoto I	2013	Measurement and evaluation of livelihood assets in sustainable forest commons governance
43	Chen HY, Zhu T, Krott M, Maddox D	2013	Community forestry management and livelihood development in northwest China: integration of governance, project design, and community participation
163	Chhetri B, Lund J, Nielsen √ÉÀú	2012	The public finance potential of community forestry in Nepal
44	Chhetri BBK, Larsen HO, Smith-Hall C	2012	Law Enforcement in Community Forestry: Consequences for the Poor
164	Choocharoen C, Schneider A, Neef A, Georgiadis P	2013	Income Options for the Poorest of the Poor: The Case of Cardamom in Northern Laos
165	Choudhary D, Kalab S, Todariac N, Rawatd R, Kunware M, Kollmairf M	2013	Upgrading mountain people in medicinal and aromatic plants value chains: lessons for sustainable management and income generation from Uttarakhand, India
166	Chowdhury M, Gudmundsson C, Izumiyama S, Koike M, Nazia N, Rana MD, Mukul S, Muhammed N, Redowan M	2014	Community attitudes toward forest conservation programs through collaborative protected area management in Bangladesh
45	Chowdury MSH, Kolke M, Rana P, Muhammed N	2013	Community development through collaborative management of protected areas: Evidence from Bangladesh with a case of Rema-Kalenga Wildlife Sanctuary
46	Clements T, John A, Nielsen K, An D, Tan S, Milner-Gulland EJ	2010	Payments for biodiversity conservation in the context of weak institutions: Comparison of three programs from Cambodia
167	Coleman E, Fleischman F	2012	Comparing Forest Decentralization and Local Institutional Change in Bolivia, Kenya, Mexico, and Uganda
187	Coleman E, Mwangi E	2013	Women's participation in forest management: A cross-country analysis
47	Danesh Miah M, Abubokor Siddik M, Yong Shin M	2013	Socio-economic and environmental impacts of casuarina shelterbelt in the Chittagong coast of Bangladesh
48	Das N	2012	Impact of participatory forestry program on sustainable rural livelihoods: Lessons from an Indian province
49	Das N	2010	Incidence of forest income on reduction of inequality: Evidence from forest dependent households in milieu of joint forest management.
188	Das N	2011	Women's dependence on forest and participation in forestry: A case study of joint forest management programme in West Bengal
50	Das N, Sarker D	2009	Impact of a moral hazard problem in the Joint Forest Management Programme: A study from forest-dependent households in West Bengal
51	Datta D, Chatterjee D	2012	Assessment of community-based initiatives in sustainable management of Indian dry deciduous forests
52	Debnath D, Dasgupta S	2006	Livelihoods Generation and Poverty Reduction Attempts in Joint Forest Management Activities in Madhya Pradesh
53	Derkyi M, Ros-Tonen MAF, Kyereh B, Dietz T	2013	Emerging forest regimes and livelihoods in the Tano Offin Forest Reserve, Ghana: Implications for Social Safeguards
221	Dhakal B, Bigsby H, Cullen R	2011	Forests for Food Security and Livelihood Sustainability: Policy Problems and Opportunities for Small Farmers in Nepal
222	Dhakal B, Bigsby H, Cullen R	2007	The Link Between Community Forestry Policies and Poverty and Unemployment in Rural Nepal
54	Dhakal M, Masuda M	2009	Local pricing system of forest products and its relations to equitable benefit sharing and livelihood improvement in the lowland community forestry program in Nepal
223	Djamhuri T	2008	Community participation in a social forestry program in Central Java, Indonesia: the effect of incentive structure and social capital
55	Dolisca F, McDaniel JM, Teeter LD	2007	Farmers' perceptions towards forests: A case study from Haiti
56	Dongol CM, Hughey KFD, Bigsby HR	2002	Capital formation and sustainable community forestry in Nepal
224	Duchelle A, Cronkleton P, Kainer K, Guanacoma G, Gezan S	2011	Resource Theft in Tropical Forest Communities: Implications for Nontimber Management, Livelihoods, and Conservation
57	Duchelle AE, Kainer KA, Wadt LHO	2014	Is Certification Associated with Better Forest Management and Socioeconomic Benefits? A Comparative Analysis of Three Certification Schemes Applied to Brazil Nuts in Western Amazonia
189	Edmonds EV	2002	Government-initiated community resource management and local resource extraction from Nepal's forests
226	Faße A, Grote U	2013	The economic relevance of sustainable agroforestry practices: An empirical analysis from Tanzania
225	Faße A, Winter E, Grote U	2014	Bioenergy and rural development: The role of agroforestry in a Tanzanian village economy
227	Ferraro P, Hanauer M	2014	Quantifying causal mechanisms to determine how protected areas affect poverty through changes in ecosystem services and infrastructure
58	Ferraro PJ, Hanaeur MM	2011	Protecting Ecosystems and Alleviating Poverty with Parks and Reserves: Win-Win or Tradeoffs?
59	Ferraro PJ, Hanauer MM, Miteva DA, Nelson JL, Pattanayak SK, Nolte C, Sims KRE	2015	Estimating the impacts of conservation on ecosystem services and poverty by integrating modeling and evaluation
60	Ferraro PJ, Hanauer MM, Sims KRE	2011	Conditions associated with protected area success in conservation and poverty reduction
61	Fu Y, Chen J, Guo H, Chen A, Cui J, Hu H	2009	The role of non-timber forest products during agroecosystem shift in Xishuangbanna, southwestern China
62	Fu Y, Chen J, Guo J, Hu H, Chen A, Cui J	2009	Rain forest dwellers' livelihoods: income generation, household wealth and NTFP sales, a case study from Xishuangbanna, SW China
63	Fujita Y, Phanvilay K	2008	Land and forest allocation in Lao People's Democratic Republic: Comparison of case studies from community-based natural resource management research
64	Garcia-Amado LR, Perez MR, Dahringer G, Escutia FR, Garcia SB, Mejia EC	2013	From wild harvesting to agroforest cultivation: A Chamaedorea palm case study from Chiapas, Mexico
65	Garcia-Amado LR, Perez MR, Iniesta-Arandia I, Dahringer G, Reyes F, Barrasa S	2012	Building ties: social capital network analysis of a forest community in a biosphere reserve in Chiapas, Mexico
203	Garcia-Amado LR, Perez, MR, Escutia FR, Garcia SB, Mejia EC	2011	Efficiency of Payments for Environmental Services: Equity and additionality in a case study from a Biosphere Reserve in Chiapas, Mexico
66	Gauli K, Hauser M	2009	Pro-poor Commercial Management of Non-timber Forest Products in Nepal's Community Forest User Groups: Factors for Success
67	Gauli K, Hauser M	2011	Commercial management of non-timber forest products in Nepal's community forest users groups: who benefits?
68	Gbedomon RC, Floquet A, Mongbo R, Salako VK, Fandohan AB, Assogbadjo AE, Kakai RG	2016	Socio-economic and ecological outcomes of community based forest management: A case study from Tobé-Kpobidon forest in Benin, Western Africa
69	Gelo D, Koch SF	2012	Welfare and Common Property Rights Forestry: Evidence from Ethiopian Villages
70	Gelo D, Koch SF	2014	The Impact of Common Property Right Forestry: Evidence from Ethiopian Villages
71	Gelo D, Muchapondwa E, Koch SF	2016	Decentralization, market integration and efficiency-equity trade-offs: Evidence from Joint Forest Management in Ethiopian villages
72	Ghorbani A, Langenberger G, Liu JX, Wehner S, Sauerborn J	2012	Diversity of Medicinal and Food Plants as Non-timber Forest Products in Naban River Watershed National Nature Reserve (China): Implications for Livelihood Improvement and Biodiversity Conservation
190	Ghosh N, Uddhammar E	2013	Tiger, Lion, and Human Life in the Heart of Wilderness: Impacts of Institutional Tourism on Development and Conservation in East Africa and India
73	GOBEZE T, BEKELE M, LEMENIH M, and KASSA H	2009	Participatory forest management and its impacts on livelihoods and forest status: the case of Bonga forest in Ethiopia
74	Gordon I, Ayiemba W	2003	Harnessing butterfly biodiversity for improving livelihoods and forest conservation: The Kipepeo Project
75	Gross-Camp ND, Martin A, McGuire S, Kebede B, Munyarukaza J	2012	Payments for ecosystem services in an African protected area: exploring issues of legitimacy, fairness, equity and effectiveness
76	Gurung A, Bista R, Karki R, Shrestha S, Uprety D, Oh SE	2012	Community-based forest management and its role in improving forest conditions in Nepal
77	Gurung DB, Seeland K	2011	Ecotourism benefits and livelihood improvement for sustainable development in the nature conservation areas of Bhutan
78	Ha TTP, van Dijk H, Visser L	2014	Impacts of changes in mangrove forest management practices on forest accessibility and livelihood: A case study in mangrove-shrimp farming system in Ca Mau Province, Mekong Delta, Vietnam
79	Ha TTT, van Dijk H, Bush SR	2012	Mangrove conservation or shrimp farmer's livelihood? The devolution of forest management and benefit sharing in the Mekong Delta, Vietnam
80	Haglund E, Ndkeunga J, Snook L, Pasternak D	2011	Dry land tree management for improved household livelihoods: Farmer managed natural regeneration in Niger
81	Harada K, Prabowo D, Aliadi A, Ichihara J, Ma H	2015	How Can Social Safeguards of REDD+ Function Effectively Conserve Forests and Improve Local Livelihoods? A Case from Meru Betiri National Park, East Java, Indonesia
82	Harada K, Wiyono	2013	Certification of a Community-based Forest Enterprise for Improving Institutional Management and Household Income: A Case from Southeast Sulawesi, Indonesia
83	Hartter J	2010	Resource Use and Ecosystem Services in a Forest Park Landscape
84	Hashiguchi H, Pulhin JM, Dizon JT, Camacho LD	2016	Impacts of Community-Based Forest Management Policies Implemented by a Local Forest Institution: A Case Study from Bayombong, Nueva Vizcaya, Philippines
85	Hayes T, Murtinho F, Wolff H	2015	An institutional analysis of Payment for Environmental Services on collectively managed lands in Ecuador
158	He J, Zhou Z, Yang H, Xu J	2011	Integrative Management of Commercialized Wild Mushroom: A Case Study of Thelephora ganbajun in Yunnan, Southwest China
86	HEGDE R, BULL G, WUNDER S, KOZAK R	2014	Household participation in a Payments for Environmental Services programme: the Nhambita Forest Carbon Project (Mozambique)
168	Hegde R, Bull GQ	2011	Performance of an agro-forestry based Payments-for-Environmental-Services project in Mozambique: A household level analysis
169	Heubach K, Wittig R, Nuppenau E, Hahn K	2011	The economic importance of non-timber forest products (NTFPs) for livelihood maintenance of rural west African communities: A case study from northern Benin
87	Hickey G, Pouliot M, Smith-Hall C, Wunder S, Nielsen M	2016	Quantifying the economic contribution of wild food harvests to rural livelihoods: A global-comparative analysis
88	Hogarth NJ	2013	The link between smallholder bamboo shoot management, income, and livelihoods: A case study in southern China
89	Huang L, Shao Q, Liu J	2012	Forest restoration to achieve both ecological and economic progress, Poyang Lake basin, China
170	Hussain SA, Badola R	2010	Valuing mangrove benefits: contribution of mangrove forests to local livelihoods in Bhitarkanika Conservation Area, East Coast of India
90	Islam KK, Sato N	2013	Protected Sal Forest and Livelihoods of Ethnic Minorities: Experience From Bangladesh
91	Islam KK, Sato N	2012	Participatory forestry in Bangladesh: has it helped to increase the livelihoods of Sal forests-dependent people?
92	Ite U, Adams W	2000	EXPECTATIONS, IMPACTS AND ATTITUDES: CONSERVATION AND DEVELOPMENT IN CROSS RIVER NATIONAL PARK, NIGERIA
93	Jagger P	2008	FOREST INCOMES AFTER UGANDA'S FOREST SECTOR REFORM: Are the Rural Poor Gaining?
171	Jagger P, Shively G, Arinaitwe A	2012	Circular migration, small-scale logging, and household livelihoods in Uganda
159	Jain SK, Singh P	2000	Economic analysis of industrial agroforestry: poplar (Populus deltoides) in Uttar Pradesh (India)
160	Jarzebski MP, Tumilba V, Yamamoto H	2016	Application of a tri-capital community resilience framework for assessing the social-ecological system sustainability of community-based forest management in the Philippines
161	Jindal R, Kerr JM, Carter S	2012	Reducing Poverty Through Carbon Forestry? Impacts of the N√¢‚Ç¨‚Ñ¢hambita Community Carbon Project in Mozambique
172	Jones S	2007	Tigers, trees and Tharu: An analysis of community forestry in the buffer zone of the Royal Chitwan National Park, Nepal
94	Jumbe C, Angelsen A	2007	Has Forest Co-management in Malawi Benefited the Poor?
95	Jumbe C, Angelsen A	2006	Do the Poor Benefit from Devolution Policies? Evidence from Malawi's Forest Co-Management Program
96	Kabubo-Mariara J	2013	Forest-poverty nexus: Exploring the contribution of foreststo rural livelihoods in Kenya
173	Kalonga SK, Kulindwa KA, Mshale BI	2015	Equity in Distribution of Proceeds from Forest Products from Certified Community-Based Forest Management in Kilwa District, Tanzania
174	Kamaga P, Vedeld P, Sjaastad E	2009	Forest incomes and rural livelihoods in Chiradzulu District, Malawi
175	Kar SP, Jacobsen MG	2012	NTFP income contribution to household economy and related socio-economic factors: Lessons from Bangladesh
97	Karki ST	2013	Do protected areas and conservation incentives contribute to sustainable livelihoods? A case study of Bardia National Park, Nepal
98	Kaushal K, Melkani V, Kala J	2005	Sustainable poverty alleviation through a forestry project in Tamilnadu State of India
99	KHATRI-CHHETRI A	2006	Local Institutions and Forest Products Extraction: Evidence from Forest Management in Nepal
176	Khatun K, Gross-Camp N, Corbera E, Martin A, Ball S, Massao G	2015	When Participatory Forest Management makes money: insights from Tanzania on governance, benefit sharing, and implications for REDD+
177	Khundi F, Jagger P, Shively G, Sserunkuuma D	2011	Income, poverty and charcoal production in Uganda
100	Kibria ASMG, Jashimuddin M, Makoto I	2014	Effects of participatory forest management on livelihood capitals of the community in Cox's Bazar, Bangladesh
101	Kohlin G, Amacher GS	2005	Welfare Implications of Community Forest Plantations in Developing Countries: The Orissa Social Forestry Project
102	Korhonen K, Rahkonen O, Hemminki E	2004	Implications of integrated nature conservation for human reproductive health: a case study from Ranomafana National Park, Madagascar
178	Krause T, Collen W, Nicholas KA	2013	Evaluating Safeguards in a Conservation Incentive Program: Participation, Consent, and Benefit Sharing in Indigenous Communities of the Ecuadorian Amazon
103	Kumar S	2002	Does √¢‚Ç¨Àú√¢‚Ç¨ÀúParticipation√¢‚Ç¨‚Ñ¢√¢‚Ç¨‚Ñ¢ in Common Pool Resource Management Help the Poor? A Social Cost√¢‚Ç¨‚ÄúBenefit Analysis of Joint Forest Management in Jharkhand, India
179	L'Roe J, Naughton-Treves L	2014	Effects of a policy-induced income shock on forest-dependent households in the Peruvian Amazon
104	Lambini CK, Nguyen TT	2014	A comparative analysis of the effects of institutional property rights on forest livelihoods and forest conditions: Evidence from Ghana and Vietnam
231	Lawrence A, Ambrose-Oji B	2015	Beauty, friends, power, money: navigating the impacts of community woodlands
105	Le HD, Smith C, Herbohn J	2014	What drives the success of reforestation projects in tropical developing countries? The case of the Philippines
106	Leclercq, B.	2010	Links Between Conservation/Development Projects and International Conventions and Programs : The Southeastern Rainforest of Madagascar
230	Leisher C, Temsah G, Booker F, Day M, Samberg L, Prosnitz D, Agarwal B, Matthews E, Roe D, Russell D, Sunderland T, Wilkie D	2016	Does the gender composition of forest and fishery management groups affect resource governance and conservation outcomes? A systematic map
180	Lescuyer G	2013	Sustainable Forest Management at the Local Scale: A Comparative Analysis of Community Forests and Domestic Forests in Cameroon
181	Lescuyer G, Mvondo SA, Essoungou JN, Toison V, Trebuchon J, Fauvet N	2012	Logging Concessions and Local Livelihoods in Cameroon: from Indifference to Alliance?
107	Lewark S, George L, Karmann M	2011	Study of gender equality in community based forest certification programmes in Nepal
182	Li F, Hongfend C, Wenhua L	2007	Socioeconomic Impact of Forest Eco-compensation Mechanism in Hainan Province of China
108	Li J, Feldman MW, Li S, Daily GC	2011	Rural household income and inequality under the Sloping Land Conversion Program in western China
109	Liang Y, Li S, Feldman MW, Daily GC	2012	Does household composition matter? The impact of the Grain for Green Program on rural livelihoods in China
110	Liu C, Lu J, Yin R	2010	An Estimation of the Effects of China's Priority Forestry Programs on Farmers' Income
191	Liu T, Liu C, Liu H, Wang S, Rong Q, Zhu W	2014	Did the Key Priority Forestry Programs affect income inequality in rural China?
111	Lund JF, Baral K, Bhandari NS, Chhetri BBK, Larsen HO, Nielsen OJ, Puri L, Rutt RL, Treue T	2014	Who benefits from taxation of forest products in Nepal's community forests?
112	Lund JF, Treue T	2008	Are We Getting There? Evidence of Decentralized Forest Management from the Tanzanian Miombo Woodlands
113	Ly N	2013	Evaluating the Pilot Implementation of Payment for Forest Environmental Services in Lam Dong, Vietnam
114	Lybbert T, Aboudrare A, Chaloud D, Magnan N, Nash M	2011	Booming markets for Moroccan argan oil appear to benefit some rural households while threatening the endemic argan forest
192	Machado F, Gordon J	2012	Extracting Value from the Forest: Lessons learned in the Acre landscape, Brazil
115	Mahapatra AK, Shackleton CM	2012	Exploring the relationships between trade in natural products, cash income and livelihoods in tropical forest regions of Eastern India
116	Maharjan MR, Dhakal TR, Thapa SK, Schreckenberg K, Luttrell C	2009	Improving the bene ts to the poor from community forestry in the Churia region of Nepal
195	Marsh R	1998	Building on traditional gardening to improve household food security
196	Martin A, Gross-Camp N, Kebede B, McGuire S	2014	Measuring effectiveness, efficiency and equity in an experimental Payments for Ecosystem Services trial
117	Martini E, Roshetko JM, van Noordwijk M, Rahmanulloh A, Mulyoutami E, Joshi L, Budidarsono S	2012	Sugar palm (Arenga pinnata (Wurmb) Merr.) for livelihoods and biodiversity conservation in the orangutan habitat of Batang Toru, North Sumatra, Indonesia: mixed prospects for domestication
118	Maskey V, Gebremedhin TG, Dalton TJ	2006	Social and cultural determinants of collective management of community forest in Nepal
119	Matiku P, Caleb M, Callistus O	2013	The Impact of Participatory Forest Management on Local Community Livelihoods in the Arabuko√¢‚Ç¨¬êSokoke Forest, Kenya
197	Mazunda J, Shively G	2015	Measuring the forest and income impacts of forest user group participation under Malawi's Forest Co-management Program
193	Mbuvi MTE, Mustoki JK, Ongugo PO	2015	Equity Mechanisms in Traditional Forest Management Systems: A Case Study of Loita Forest in Kenya
120	McDougall C, Jiggins J, Pandit BH, Rana SKTM, Leeuwis C	2013	Does Adaptive Collaborative Forest Governance Affect Poverty? Participatory Action Research in Nepal's Community Forests
198	McDougall CL, Leeuwis C, Bhattarai T, Maharjan MR, Jiggins J	2013	Engaging women and the poor: adaptive collaborative governance of community forests in Nepal
199	Meaza H, Tsegaye D, Nyssen J	2016	Allocation of degraded hillsides to landless farmers and improved livelihoods in Tigray, Ethiopia
200	Menton MCS, Merry FD, Lawrence A, Brown N	2009	Company-Community Logging Contracts in Amazonian Settlements: Impacts on Livelihoods and NTFP Harvests
121	Meshack CK, Adhikari B, Doggart N, Lovett JC	2006	Transaction costs of community-based forest management: empirical evidence from Tanzania
122	Miah MD, Ahmed FU	2013	Conservation of a Tropical Wet Semi-evergreen Forest Ecosystem by an Indigenous Community in the Bandarban Hill District of Bangladesh: The Role of Intervention
239	Miranda JJ, Corral L, Blackman A, Asner G, Lima E	2014	Effects of Protected Areas on Forest Cover Change and Local Communities
201	Miteva DA, Loucks CJ, Pattanayak SK	2015	Social and Environmental Impacts of Forest Management Certification in Indonesia
123	Mohammed AJ, Inoue M	2012	Drawbacks of decentralized natural resource management: experience from Chilimo Participatory Forest Management project, Ethiopia
124	Mohammed AJ, Inoue M	2013	Forest-dependent communities' livelihood in decentralized forest governance policy epoch: case study from West Shoa zone, Ethiopia
194	Mohammed AJ, Inoue M	2014	Linking outputs and outcomes from devolved forest governance using a Modified Actor-Power-Accountability Framework (MAPAF): Case study from Chilimo forest, Ethiopia
240	Morsello C, Ruiz-Mallen I, Diaz MDM, Reyes-Garcia V	2012	The Effects of Processing Non-Timber Forest Products and Trade Partnerships on People's Well-Being and Forest Conservation in Amazonian Societies
125	Motiur RM, Furukawa Y, Kawata I, Rahman MM, Alam M	2006	Role of homestead forests in household economy and factors affecting forest production: a case study in southwest Bangladesh
126	MUHAMMED N, HAQUE F, KOIKE M	2008	THE ROLE OF PARTICIPATORY SOCIAL FORESTRY IN THE ENHANCEMENT OF THE SOCIO-ECONOMIC CONDITION OF THE RURAL POOR: A CASE STUDY OF DHAKA FOREST DIVISION IN BANGLADESH
127	Mukul SA, Manzoor Rashid AZM, Quazi SA,Uddin MB, Fox J	2012	Local peoples' responses to co-management regime in protected areas: A case study from Satchari National Park, Bangladesh
128	Mullan K, Kontoleon A, Swanson T, Zhang S	2010	Evaluation of the Impact of the Natural Forest Protection Program on Rural Household Livelihoods
202	Mutune JM, Lund JF	2016	Unpacking the impacts of "participatory"forestry policies: Evidence from Kenya
204	Naidu SC	2011	Access to benefits from forest commons in the Western Himalayas
129	Nath TK, Inoue M	2008	The upland settlement project of Bangladesh as a means of reducing land degradation and improving rural livelihoods
130	Nath TK, Inoue M	2009	Forest-based settlement project and its impacts on community livelihood in the chittagong hill tracts, Bangladesh
131	Naughton-Treves L, Alix-Garcia J, Chapman CA	2011	Lessons about parks and poverty from a decade of forest loss and economic growth around Kibale National Park, Uganda
205	Neupane RP, Thapa GB	2001	Impact of agroforestry intervention on soil fertility and farm income under the subsistence farming system of the middle hills, Nepal
132	Niesenbaum RA, Salazar ME, Diop AM	2004	Community forestry in, the Mayan Biosphere Reserve in Guatemala
133	Ogar AM, Enete AA	2010	Performance of forest management committees in Cross River state, Nigeria
134	Osorio C	2009	The effects of markets on the use of forest for the livelihood of indigenous households in the Colombian Amazon
135	Oyono P, Biyong M, Samba S	2012	Beyond the Decade of Policy and Community Euphoria: The State of Livelihoods Under New Local Rights to Forest in Rural Cameroon
232	Pagdee A, Kim Y, Daugherty PJ	2006	What makes community forest management successful: a meta-study from community forests throughout the world
206	Pailler S, Naidoo R, Burgess ND, Freeman OE, Fisher B	2015	Impacts of Community-Based Natural Resource Management on Wealth, Food Security and Child Health in Tanzania
241	Pender J, Suyanto, Kerr J, Kato E	2008	Impacts of the Hutan Kamasyarakatan Social Forestry Program in the Sumberjaya Watershed, West Lampung District of Sumatra, Indonesia
207	Persha L, Andersson K	2014	Elite capture risk and mitigation in decentralized forest governance regimes
136	Persha L, Meshack C	2016	A triple win? The impact of Tanzania's Joint Forest Management programme on livelihoods, governance and forests
137	Pinyopusarerk K, Tran TTH, Tran VD	2014	Making community forest management work in northern Vietnam by pioneering participatory action
208	Pokharel RK, Tiwari KR	2013	Good Governance Assessment in Nepal's Community Forestry
233	Pullin AS, Bangpan M, Dalrymple S, Dickson K, Haddaway NR, Healey JR, Hauari H, Hockley N, Jones JPG, Knight T, Vigurs C, Oliver S	2013	Human well-being impacts of terrestrial protected areas
237	Puri J, Nath M, Bhatia R, Glew L	2016	Examining the evidence base for forest conservation interventions
138	Rahut D, Ali A, Behera B	2015	Household participation and effects of community forest management on income and poverty levels: Empirical evidence from Bhutan
139	Rasul G, Choudhary D, Pandit BH, Kollmair M	2012	Poverty and livelihood impacts of a medicinal and aromatic plants project in India and Nepal: An assessment
209	Reyes T, Quiroz R, Msikula S	2005	Socio-economic Comparison Between Traditional and Improved Cultivation Methods in Agroforestry Systems, East Usambara Mountains, Tanzania
210	Riddell M	2013	Assessing the Impacts of Conservation and Commercial Forestry on Livelihoods in Northern Republic of Congo
211	Riehl B, Zerriffi H, Naidoo R	2015	Effects of Community-Based Natural Resource Management on Household Welfare in Namibia
140	Rizek MB, Morsello C	2012	Impacts of Trade in Non-timber Forest Products on Cooperation among Caboclo Households of the Brazilian Amazon
141	Rodriguez LG, Perez MR, Yang X, Geriletu, Belcher B, Zhou B, Li Z	2013	Maintaining the contract responsibility system of forest land distribution in China: Evidence from a novel financial compensation scheme in Daxi Village of Anji County, Zhejiang
234	Samii C, Lisiecki M, Kulkarni P, Paler L, Chavis L	2014	Effects of Payment for Environmental Services (PES) on Deforestation and Poverty in Low and Middle Income Countries: A Systematic Review
235	Samii C, Lisiecki M, Kulkarni P, Paler L, Chavis L	2014	Effects of Decentralized Forest Management (DFM) on Deforestation and Poverty in Low and Middle Income Countries: A Systematic Review
142	Sanginga PC, Abenakyo A, Kamugisha R, Martin AM, Muzira R	2010	Tracking outcomes of social capital and institutional innovations in natural resources management: Methodological issues and empirical evidence from participatory bylaw reform in Uganda
212	Shackleton S, Campbell B, Lotz-Sisitka H, Shackleton C	2008	Links between the Local Trade in Natural Products, Livelihoods and Poverty Alleviation in a Semi-arid Region of South Africa
143	Shoo RA, Songorwa AN	2013	Contribution of eco-tourism to nature conservation and improvement of livelihoods around Amani nature reserve, Tanzania
144	Sikor T, Nguyen TQ	2007	Why May Forest Devolution Not Benefit the Rural Poor Forest Entitlements in Vietnam's Central Highlands
145	Sills E, Saha S	2010	Subsidies for Rubber: Conserving Rainforests While Sustaining Livelihoods in the Amazon?
146	Sims K, Alix-Garcia J	2016	Parks versus PES: Evaluating direct and incentive-based land conservation in Mexico
213	Singh S, Singh S, Bawa SS, Sharma SC, Salaria A	2014	Impact of Makowal type water system on crop productivity in Shivalik foothills of India
238	Snilstveit B, Stevenson J, Villar PF, Eyers J, Harvey C, Panfil S, Puri J, McKinnon MC	2016	Land-use change and forestry programmes: Evidence on the effects on greenhouse gas emissions and food security
147	Spiteri A, Nepal SK	2008	Distributing conservation incentives in the buffer zone of Chitwan National Park, Nepal
242	Spiteri A, Nepal SK	2008	Evaluating Local Benefits from Conservation in Nepal's Annapurna Conservation Area
148	Sreedharan C.K., Matta J	2010	Poverty alleviation as a pathway to sustainable forest management
214	Subedi MR, Timilsina YP	2016	Evidence of User Participation in Community Forest Management in the Mid-hills of Nepal: A Case of Rule Making and Implementation
149	Suparat B, Singseewo A, Pinyoanuntapong B, Thamaseananupap P	2010	A study and development on knowledge, attitude and practice in forest conservation and reforestration of youth in Ban Khao Phra community Nakhon Nayok Province
215	Tchoundjeu Z, Degrande A, Leakey RRB, Nimino G, Kemajou E, Asaah E, Facheux C, Mbile P, Mbosso C, Sado T, Tsobeng A	2010	IMPACTS OF PARTICIPATORY TREE DOMESTICATION ON FARMER LIVELIHOODS IN WEST AND CENTRAL AFRICA
150	Thanichanon P, Schmidt-Vogt D, Messerli P, Heinimann A, Epprecht M	2013	Secondary Forests and Local Livelihoods along a Gradient of Accessibility: A Case Study in Northern Laos
151	Thoms CA	2008	Community control of resources and the challenge of improving local livelihoods: A critical examination of community forestry in Nepal
152	Ting Z, Shivakoti GP, Haiyun C, Maddox D	2012	A survey-based evaluation of community-based co-management of forest resources: a case study of Baishuijiang National Natural Reserve in China
153	Toillier A, Serpantie G, Herve D, Lardon S	2011	Livelihood Strategies and Land Use Changes in Response to Conservation: Pitfalls of Community-Based Forest Management in Madagascar
236	van Vliet N, Mertz O, Heinimann A, Langanke T, Pascual U, Schmook B, Adams C, Schmidt-Vogt D, Messerli P, Leisz, Castella J, Jorgensen L, Birch-Thomsen T, Hett C, Bech-Bruun T, Ickowitz A, Vu KC, Yasuyuki K, Fox J, Padoch C, Dressler W, Ziegler AD	2012	Trends, drivers and impacts of changes in swidden cultivation in tropical forest-agriculture frontiers: A global assessment
216	Vyamana, VG	2009	Participatory forest management in the Eastern Arc Mountains of Tanzania: who bene ts?
217	Wang C, Ouyang H, Shao B, Maclaren V, Tian Y	2005	Assessment of the Sustainability of Grain for Green in Northeast China
218	Wang C, Wen Y, Wu J	2014	The Socio-economic Effect of the Reform of the Collective Forest Rights System in Southern China: A Case of Tonggu County, Jiangxi Province
243	Weber JG, Sills SO, Bauch S, Pattanayak SK	2011	Do ICDPs Work?: An Empirical Evaluation of Forest-Based Microenterprises in the Brazilian Amazon
154	Xu J, Lu Y, Chen L, Liu Y	2009	Contribution of tourism development to protected area management: local stakeholder perspectives
155	YEMIRU T, ROOS A, CAMPBELL B, BOHLIN F	2010	Forest incomes and poverty alleviation under participatory forest management in the Bale Highlands, Southern Ethiopia
219	Yin R, Liu C, Zhao M, Yao S, Liu H	2014	The implementation and impacts of China's largest payment for ecosystem services program as revealed by longitudinal household data
156	Yuan J, Dai L, Wang Q	2008	State-Led Ecotourism Development and Nature Conservation: a Case Study of the Changbai Mountain Biosphere Reserve, China
157	Zambrano AMA, Broadbent EN, Durham WH	2010	Social and environmental effects of ecotourism in the Osa Peninsula of Costa Rica: the Lapa Rios case
